# Supplementary material for: Use of an Extract of Annona muricata Linn to Prevent High-Fat Diet Induced Metabolic Disorders in C57BL/6 Mice
Source: MDPI journal article supplement (doi:10.3390/nu11071509), 2019-07-02

Supplementary material

Acute oral toxicity

| BOX AND ANIMAL         |   | LIVER | PANCREAS | SPLEEN | LUNG | HEART | RIGHT KIDNEY | LEFT KIDNEY |
|------------------------|---|-------|----------|--------|------|-------|--------------|-------------|
| CONTROL GROUP - BOX 1  | 1 |       |          |        |      |       |              |             |
|                        | 2 |       |          |        |      |       |              |             |
|                        | 3 |       |          |        |      |       |              |             |
| CONTROL GROUP - BOX 2  | 4 |       |          |        |      |       |              |             |
|                        | 5 |       |          |        |      |       |              |             |
| AGE 2000 GROUP - BOX 1 | 1 |       |          |        |      |       |              |             |
|                        | 2 |       |          |        |      |       |              |             |
|                        | 3 |       |          |        |      |       |              |             |
| AGE 2000 GROUP - BOX 2 | 4 |       |          |        |      |       |              |             |
|                        | 5 |       |          |        |      |       |              |             |

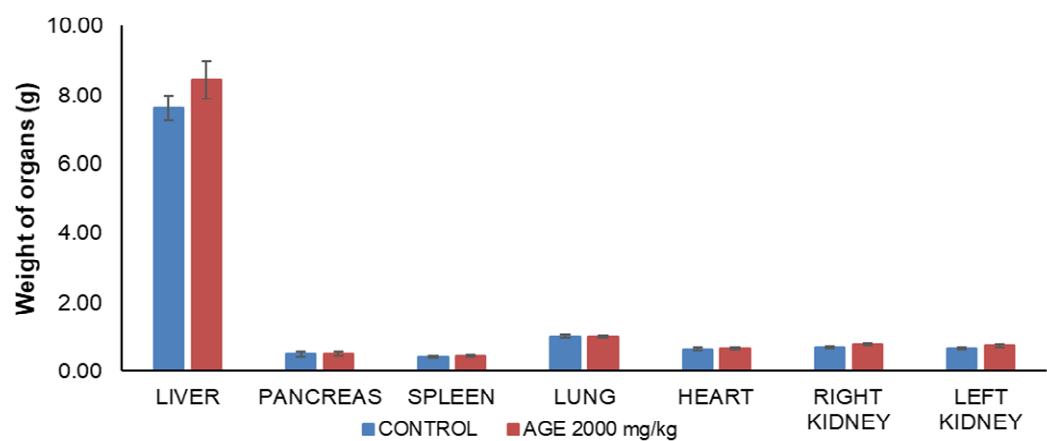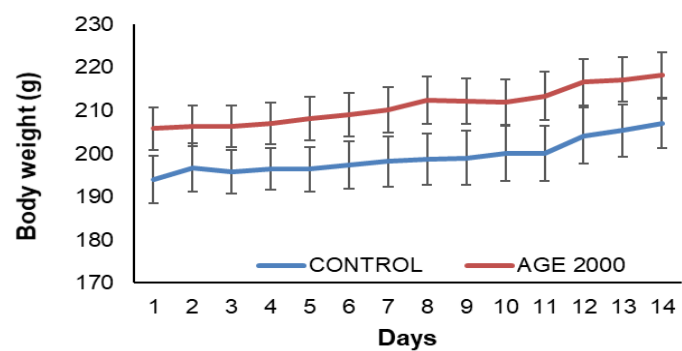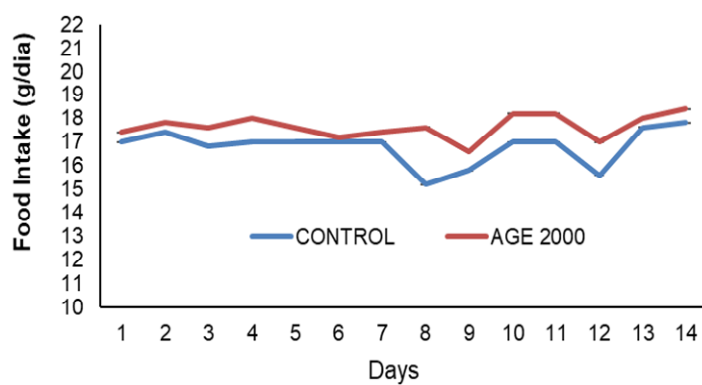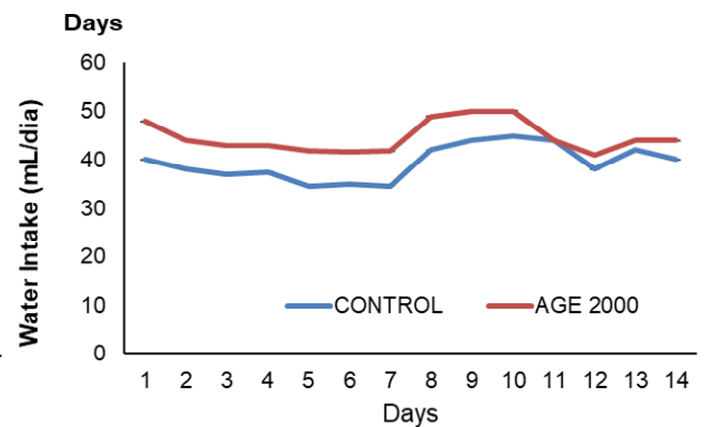

Supplement: s1 [file s1]
